# Supplementary material for: A critical review of the use of iron isotopes in atmospheric aerosol research
Source: Copernicus journal article supplement (doi:10.5194/egusphere-2025-474), 2025-02-18
Supplement: Supplementary file [file egusphere-2025-474-AC3-supplement.pdf]

Comments by Capucine Camin are in blue.

Our replies are in black.

Changes to the manuscript are highlighted in red both here and in the revised manuscript.

### **Reply to Capucine Camin**

Great manuscript! I would like to inform you about this work: <https://doi.org/10.5194/egusphere-2024-3777> (the latest version is in the discussion section).

**Reply:** We would like to thank Camin et al. for bringing their recent manuscript to our attention. We have made the following changes in the revised manuscript accordingly. We have added one paragraph to this work at the end of Section 3.3.2 (page 26), and mentioned it at the end of Section 3.3.3 (page 27) and at the beginning of Section 3.5 (page 29).
